# Supplementary material for: Immunostimulatory Effect of Sulfated Galactans from the Green Seaweed Caulerpa cupressoides var. flabellata
Source: PubMed Central journal article supplement (PMC7281474; doi:10.3390/md18050234), 2020-04-29
Supplement: marinedrugs-18-00234-s001.pdf [file marinedrugs-18-00234-s001.pdf]

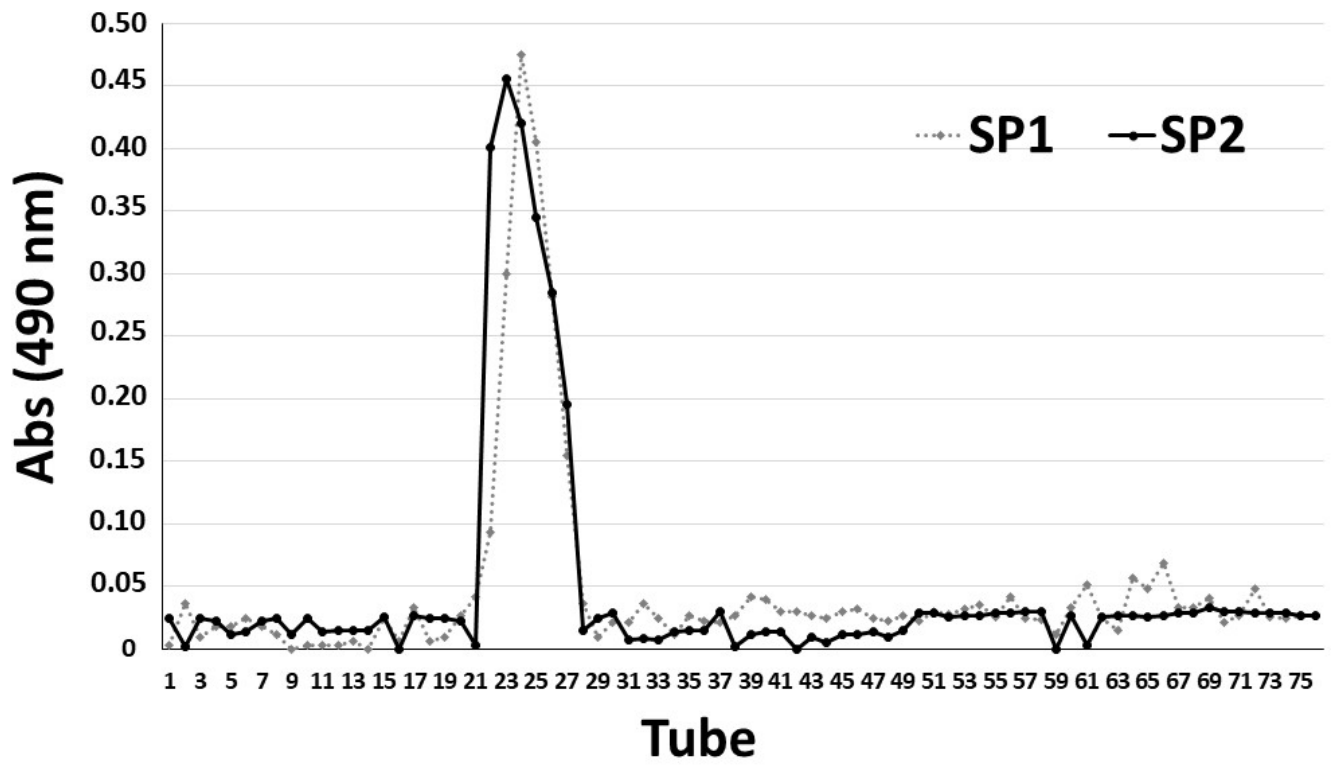

Figure S1 – The GPC chromatogram of SP1 and SP2 on a Sephadex G-100 column

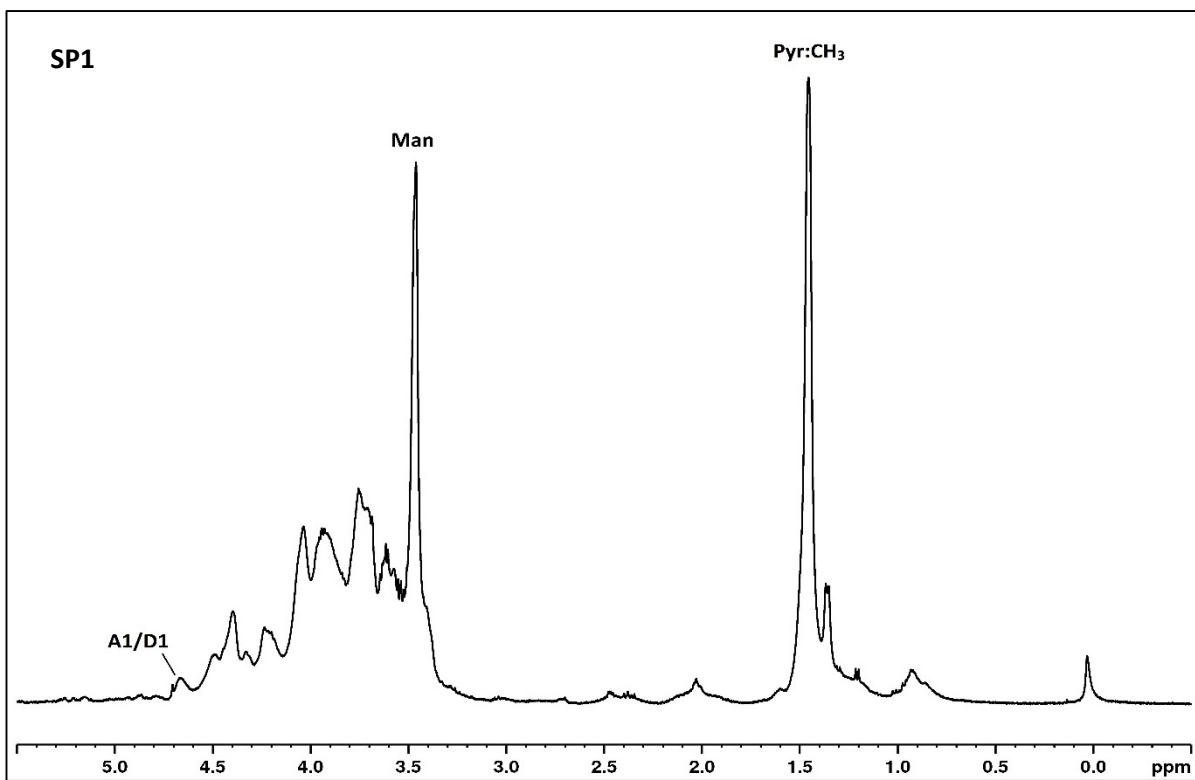

Figure S2 - <sup>1</sup>H-NMR spectrum of SP1.

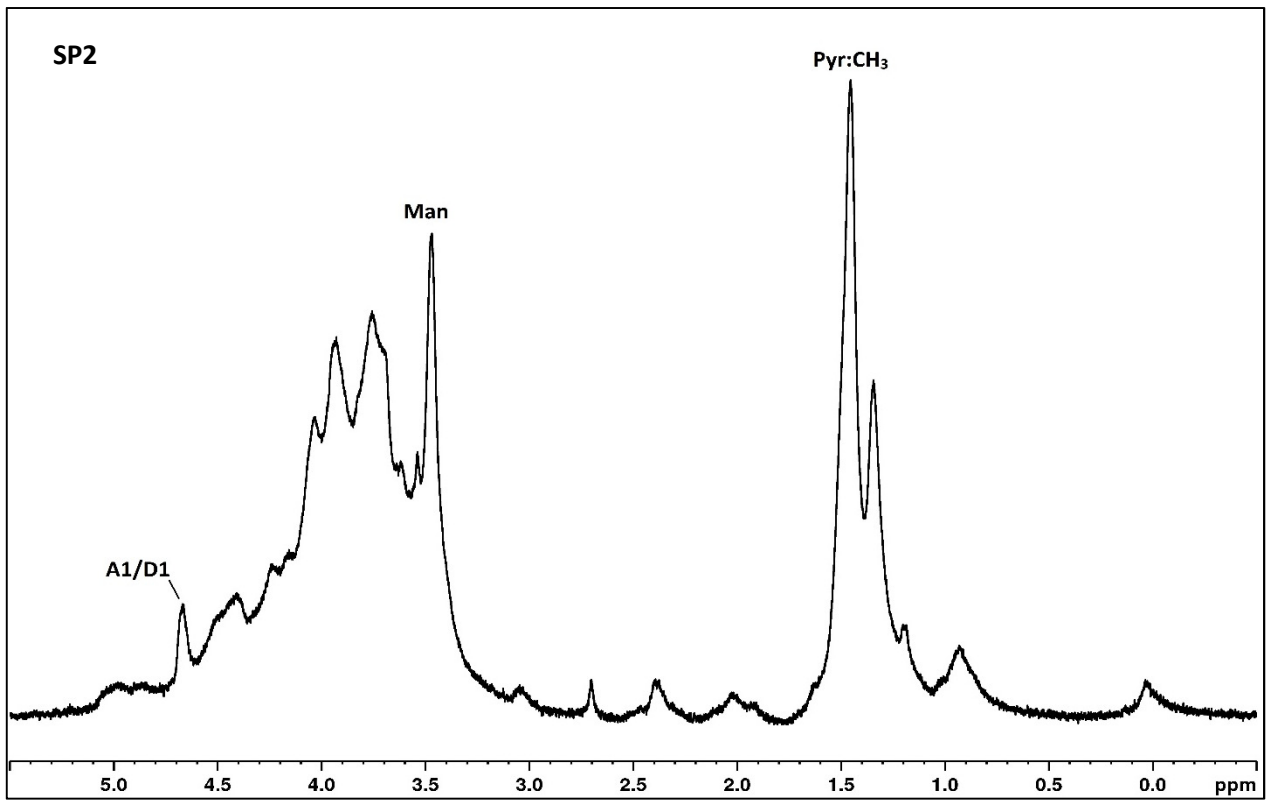

Figure S3 -  $^1\text{H-NMR}$  spectrum of SP2.

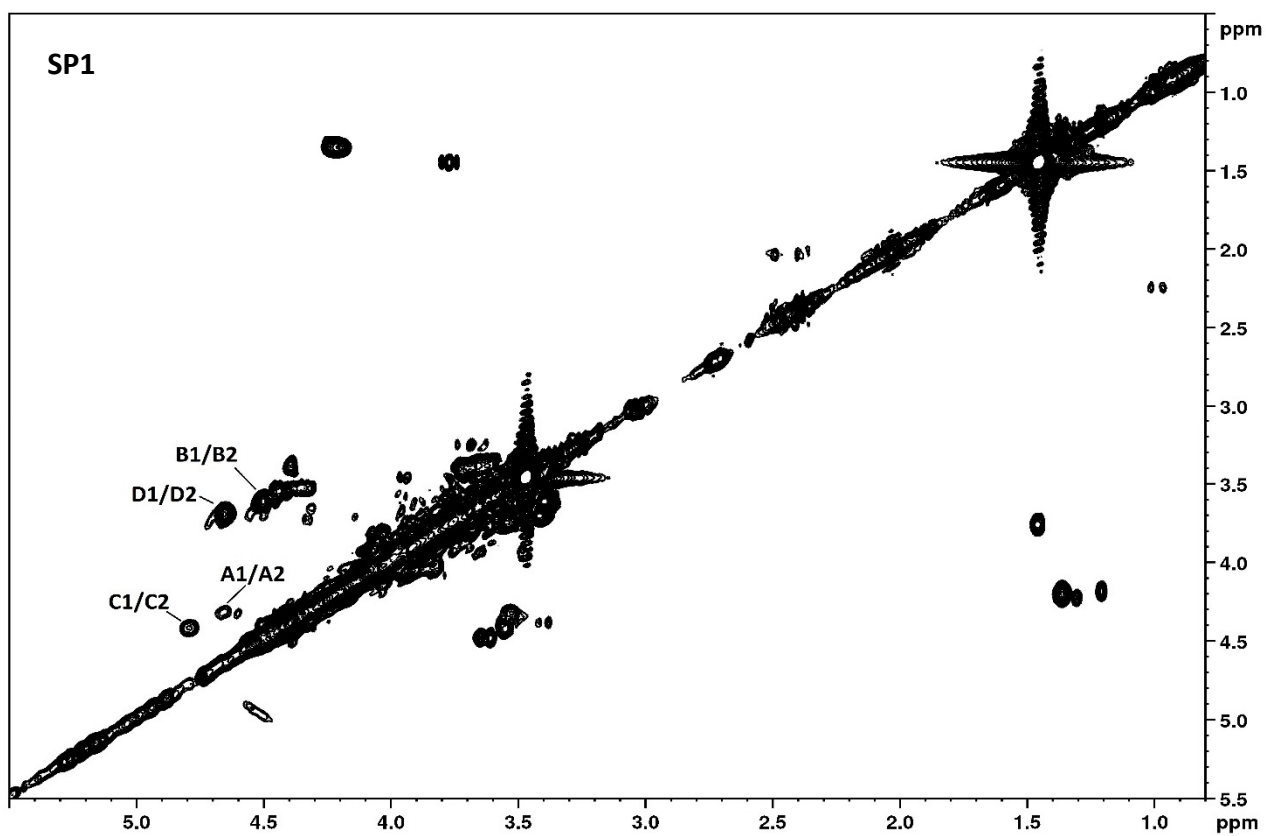

Figure S4 - <sup>1</sup>H/<sup>1</sup>H correlation 2D-NMR spectrum (COSY) of SP1.

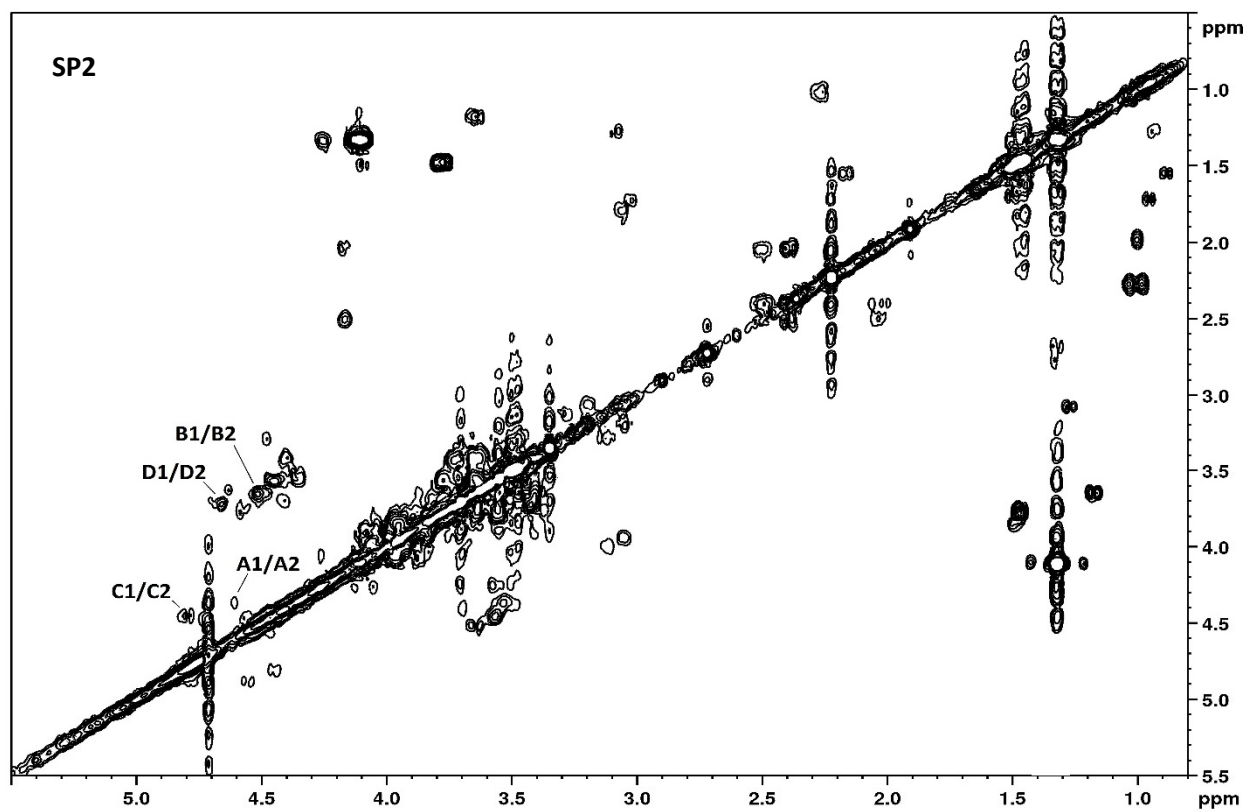

Figure S5 – <sup>1</sup>H/<sup>1</sup>H correlation 2D-NMR spectrum (COSY) of SP2.

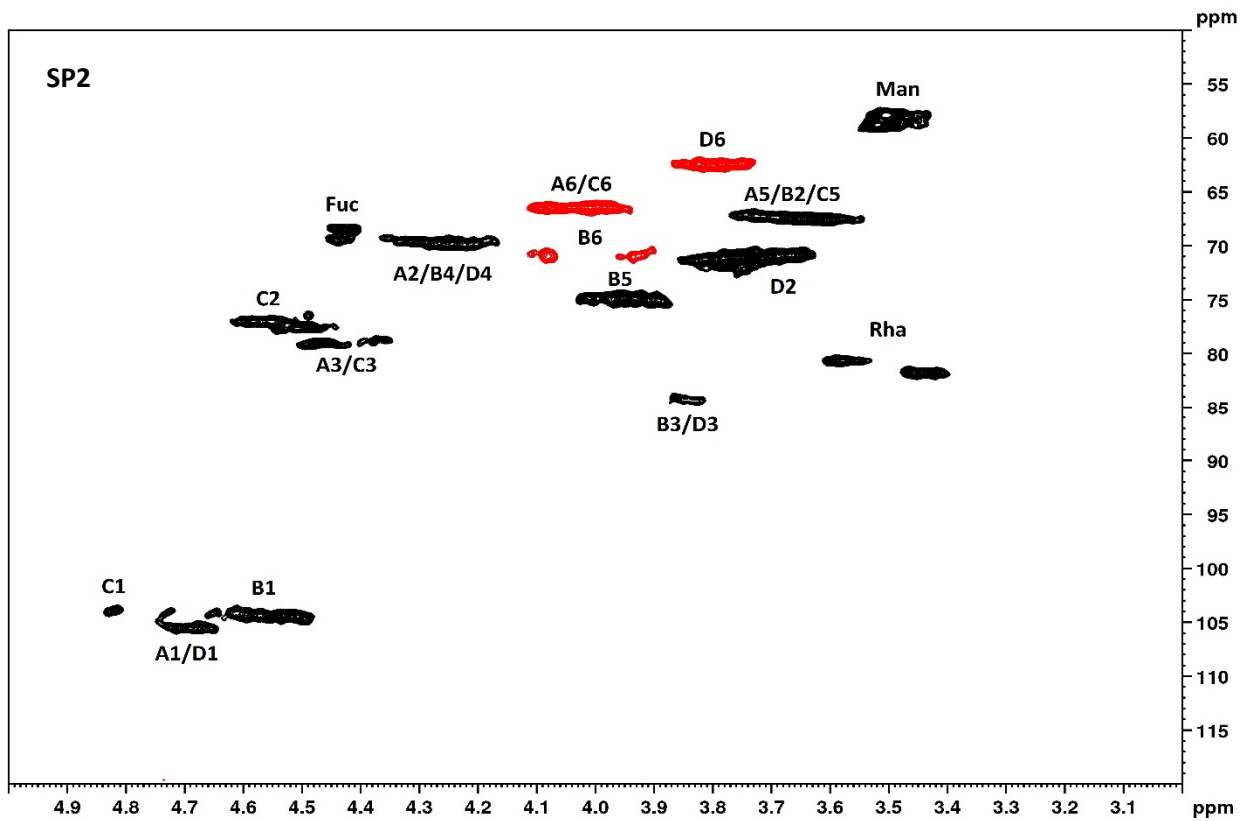

Figure S6 -  $^1\text{H}/^{13}\text{C}$  correlation 2D-NMR spectrum (HSQCed) of SP2.
